# Supplementary material for: Potential impacts of cold frontal passage on air quality over the Yangtze River Delta, China
Source: Copernicus journal article supplement (doi:10.5194/acp-19-3673-2019), 2019-03-21
Supplement: Supplementary file 1 [file acp-19-3673-2019-supplement.pdf]

Supplement of Atmos. Chem. Phys., 19, 3673–3685, 2019  
<https://doi.org/10.5194/acp-19-3673-2019-supplement>  
© Author(s) 2019. This work is distributed under  
the Creative Commons Attribution 4.0 License.

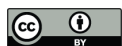

*Supplement of*

## **Potential impacts of cold frontal passage on air quality over the Yangtze River Delta, China**

**Hanqing Kang et al.**

*Correspondence to:* Bin Zhu (binzhu@nuist.edu.cn)

The copyright of individual parts of the supplement might differ from the CC BY 4.0 License.

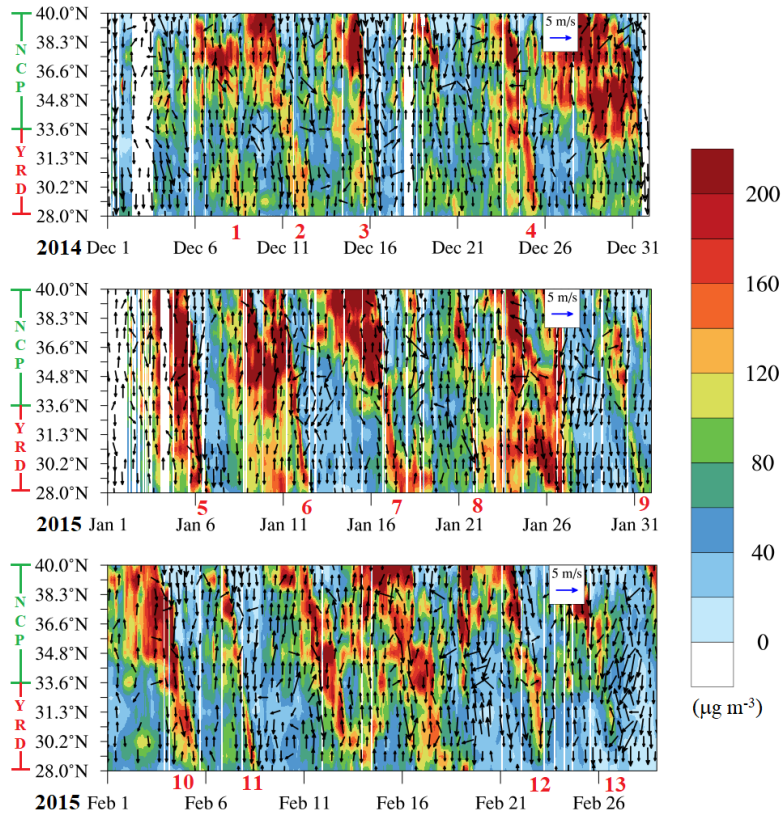

Figure S1. Observed surface PM<sub>2.5</sub> concentrations (color) and wind vectors (only the wind speeds greater than 3 m/s are shown) at 14 sites from 1 December 2014 to 28 February 2015. Labels on left axis are latitudes of the 14 observation sites. Red numbers are cold frontal episodes that transport PM<sub>2.5</sub> from NCP to YRD.

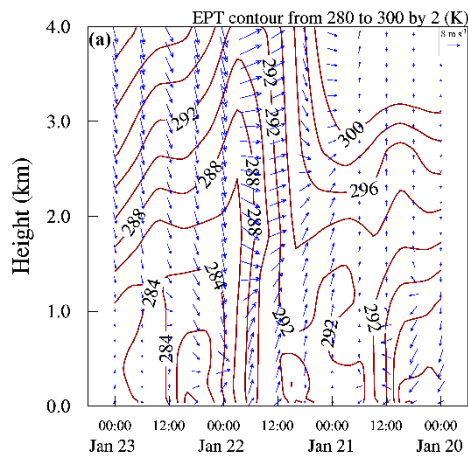

Figure S2. Time series of EPT profile and wind vectors (the vertical wind component was multiplied by 100) over Nanjing from 00:00 LST 20 January 2015 to 00:00 LST 23 January 2015.
